# Supplementary material for: UCNPs@gelatin–ZnPc nanocomposite: synthesis, imaging and anticancer properties
Source: Royal Society of Chemistry journal article supplement (doi:10.1039/c6tb00714g), 2016-01-01
Supplement: c6tb00714g1.pdf [file c6tb00714g1.pdf]

## Electronic Supplementary Information

UCNPs@gelatin-ZnPc nanocomposite: synthesis, imaging and anticancer properties

Jiating Xu, Ruichan Lv, Shaokang Du, Shili Gai\*, Fei He, Dan Yang, and Piaoping Yang\*

Key Laboratory of Superlight Materials and Surface Technology, Ministry of Education, College of Material Sciences and Chemical Engineering, Harbin Engineering University, Harbin, 150001, P. R. China.

E-mail: [yangpiaoping@hrbeu.edu.cn](mailto:yangpiaoping@hrbeu.edu.cn); [gaishili@hrbeu.edu.cn](mailto:gaishili@hrbeu.edu.cn)

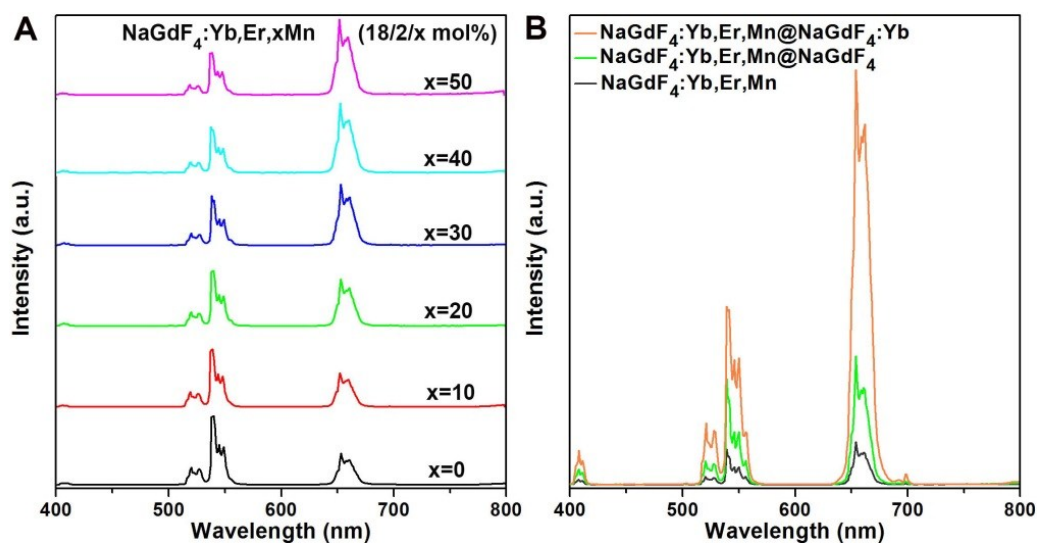

**Fig. S1** UC emission spectra of  $\text{NaGdF}_4:\text{Yb,Er,xMn}$  nanoparticles (A);  $\text{NaGdF}_4:\text{Yb,Er,xMn}$ ,  $\text{NaGdF}_4:\text{Yb,Er,Mn@NaGdF}_4$  (core-inert shell) and  $\text{NaGdF}_4:\text{Yb,Er,Mn@NaGdF}_4:\text{Yb}$  (core-active shell) nanoparticles (B).

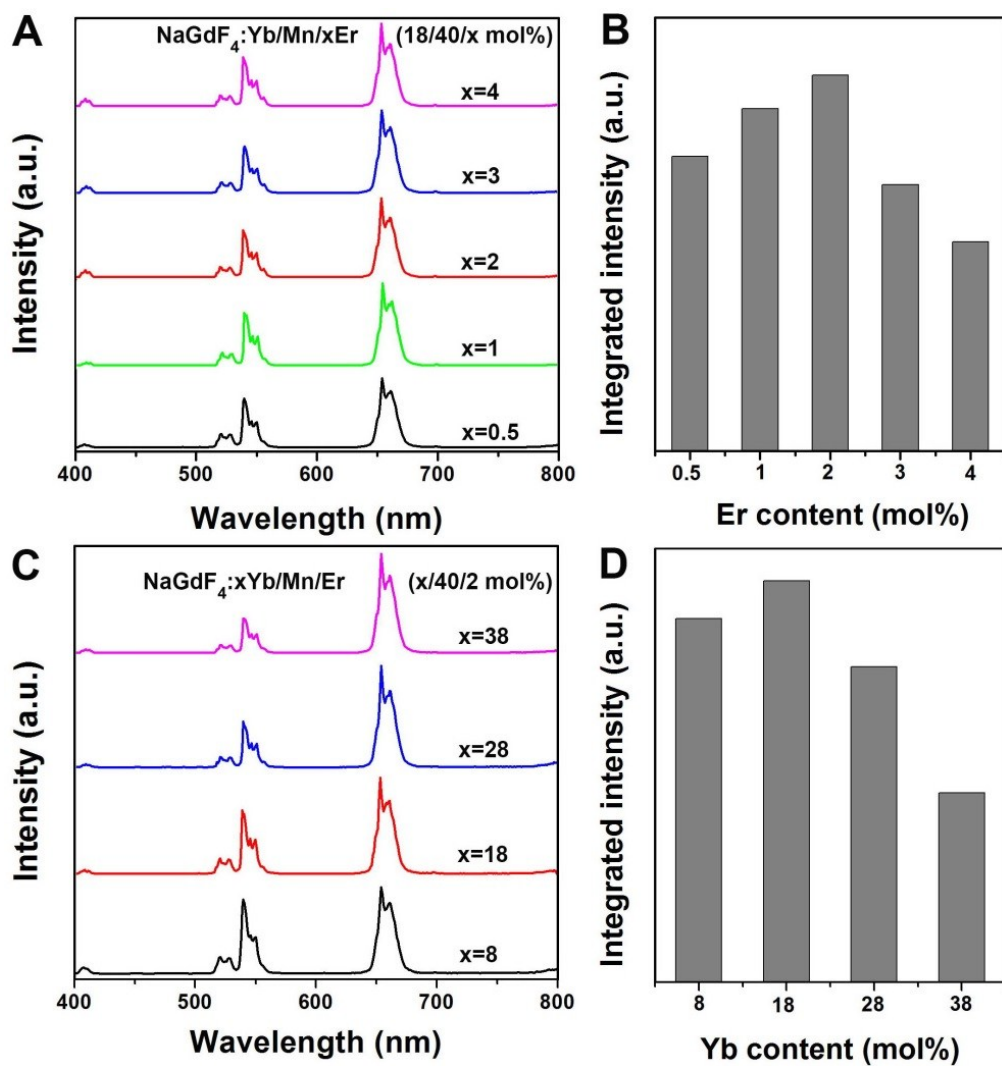

**Fig. S2** UC emission spectra (A, B) and the integrated UC emission intensity (C, D) of NaGdF<sub>4</sub>:Yb,Mn,xEr and NaGdF<sub>4</sub>:Er,Mn,xYb nanoparticles.

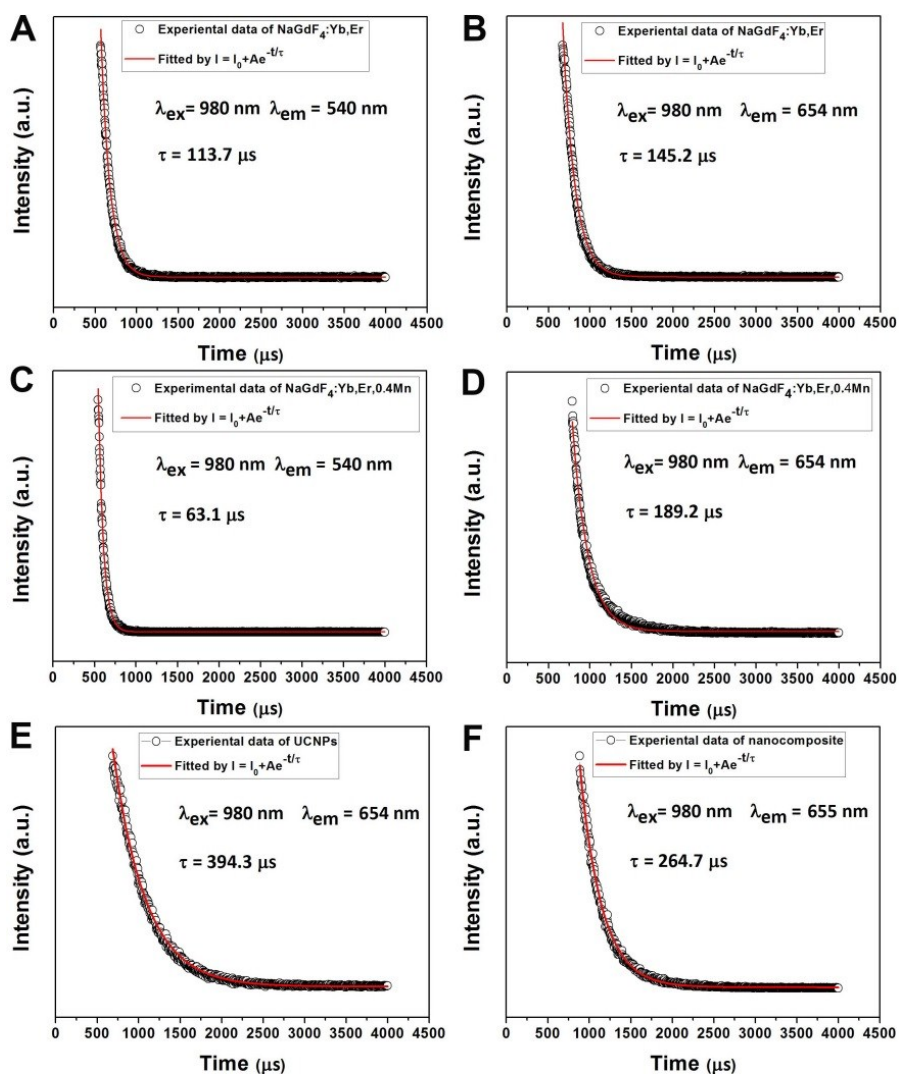

**Fig. S3** Decay curves of Er<sup>3+</sup> in NaGdF<sub>4</sub>:Yb,Er (A, B), NaGdF<sub>4</sub>:Yb,Er,0.4Mn (C, D), core-shell structured UCNP (E) and UCNP@gel-ZnPc nanocomposite (F) under 980 nm NIR light excitation.
